# Supplementary material for: Integrating whole-genome sequencing within the National Antimicrobial Resistance Surveillance Program in the Philippines
Source: PubMed Central journal article supplement (PMC7264328; doi:10.1038/s41467-020-16322-5), 2020-06-01
Supplement: 41467_2020_16322_MOESM2_ESM.pdf [file 41467_2020_16322_MOESM2_ESM.pdf]

## **Supplementary Information**

### **Integrating Whole-Genome Sequencing Within the National Antimicrobial Resistance Surveillance Program in the Philippines**

Argimón et al.

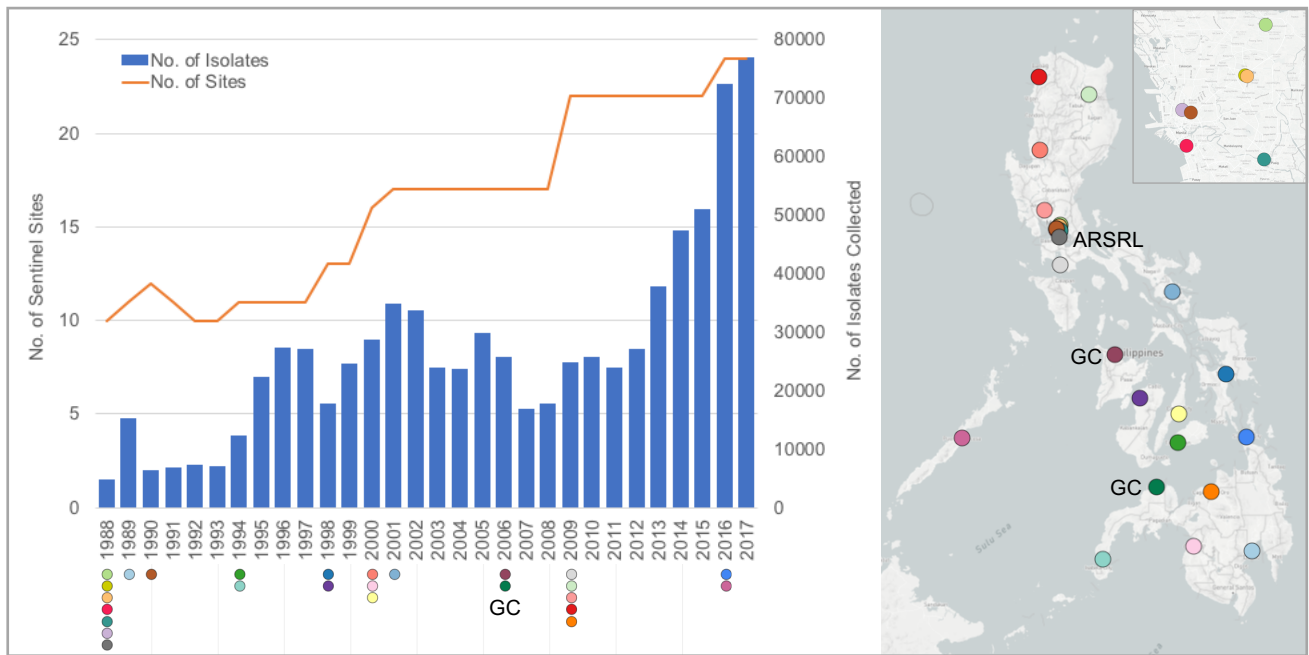

**Supplementary Figure 1. Three decades of antimicrobial resistance surveillance in the Philippines.** Total number of bacterial isolates collected by the sentinel sites per year (blue bars), number of sentinel sites participating in the program (orange line), their location (map) and year they joined ARSP (dots under the x-axis). The map inset shows the sentinel sites in the Metro Manila area. The number of sentinel sites does not include the 2 gonorrhoea surveillance (GC) sites. Only the sites that have remained in the program until the time of publication are shown by coloured dots on the map and under the x-axis. ARSRL: Antimicrobial Resistance Surveillance Reference Lab.

## Operational unit of genomic surveillance - genetic diversity and mechanisms underpinning carbapenem resistance phenotypes

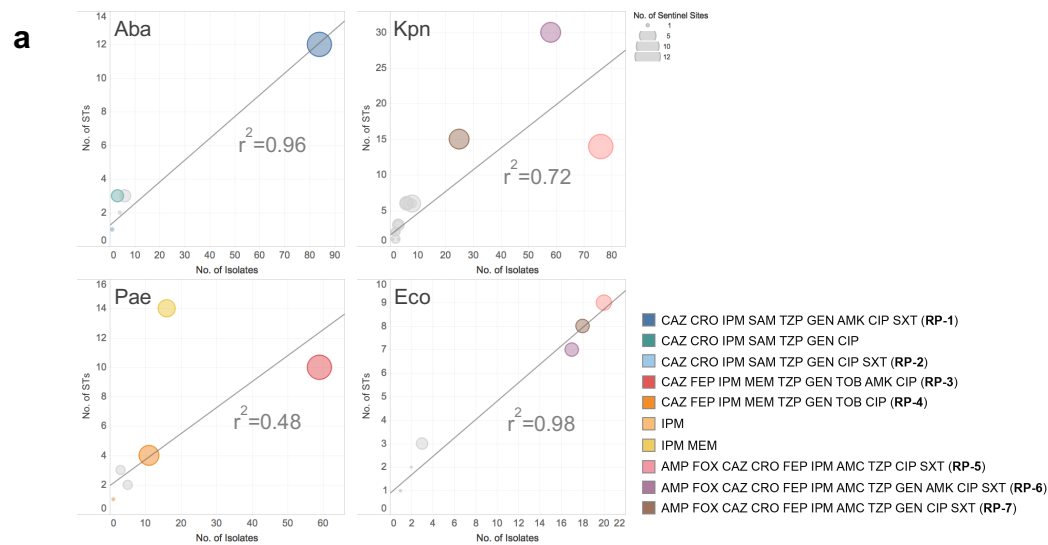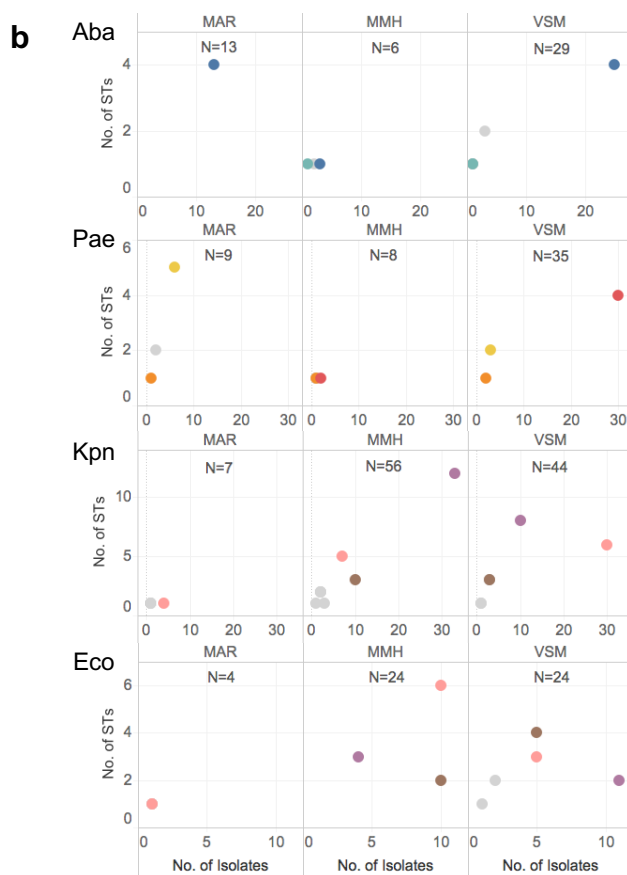

**Supplementary Figure 2. Relationship between carbapenem resistance profiles and distinct genetic lineages defined by their sequence type (ST).** Scatterplots portraying the number of STs as a function of the number of isolates sequenced for each of the carbapenem resistance profiles. Aba: *A. baumannii*. Pae: *P. aeruginosa*. Kpn: *K. pneumoniae* species complex. Eco: *E. coli*. **a** National level data (all sentinel sites combined). The size of the dot is proportional to the number of sentinel sites each profile was found on. **b** Local-level data for the three sites contributing the largest number of isolates of the four organisms combined (MAR, MMH and VSM).

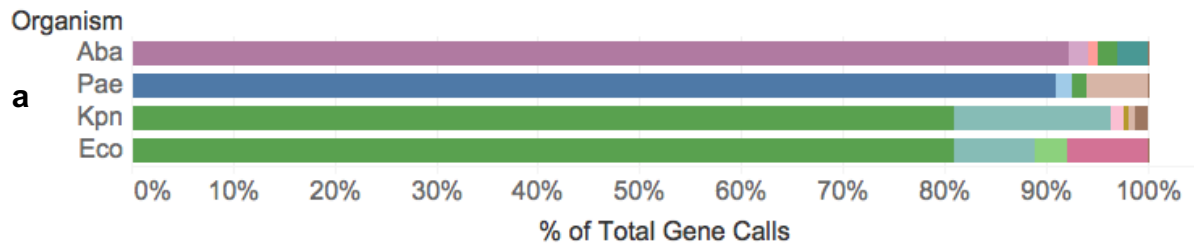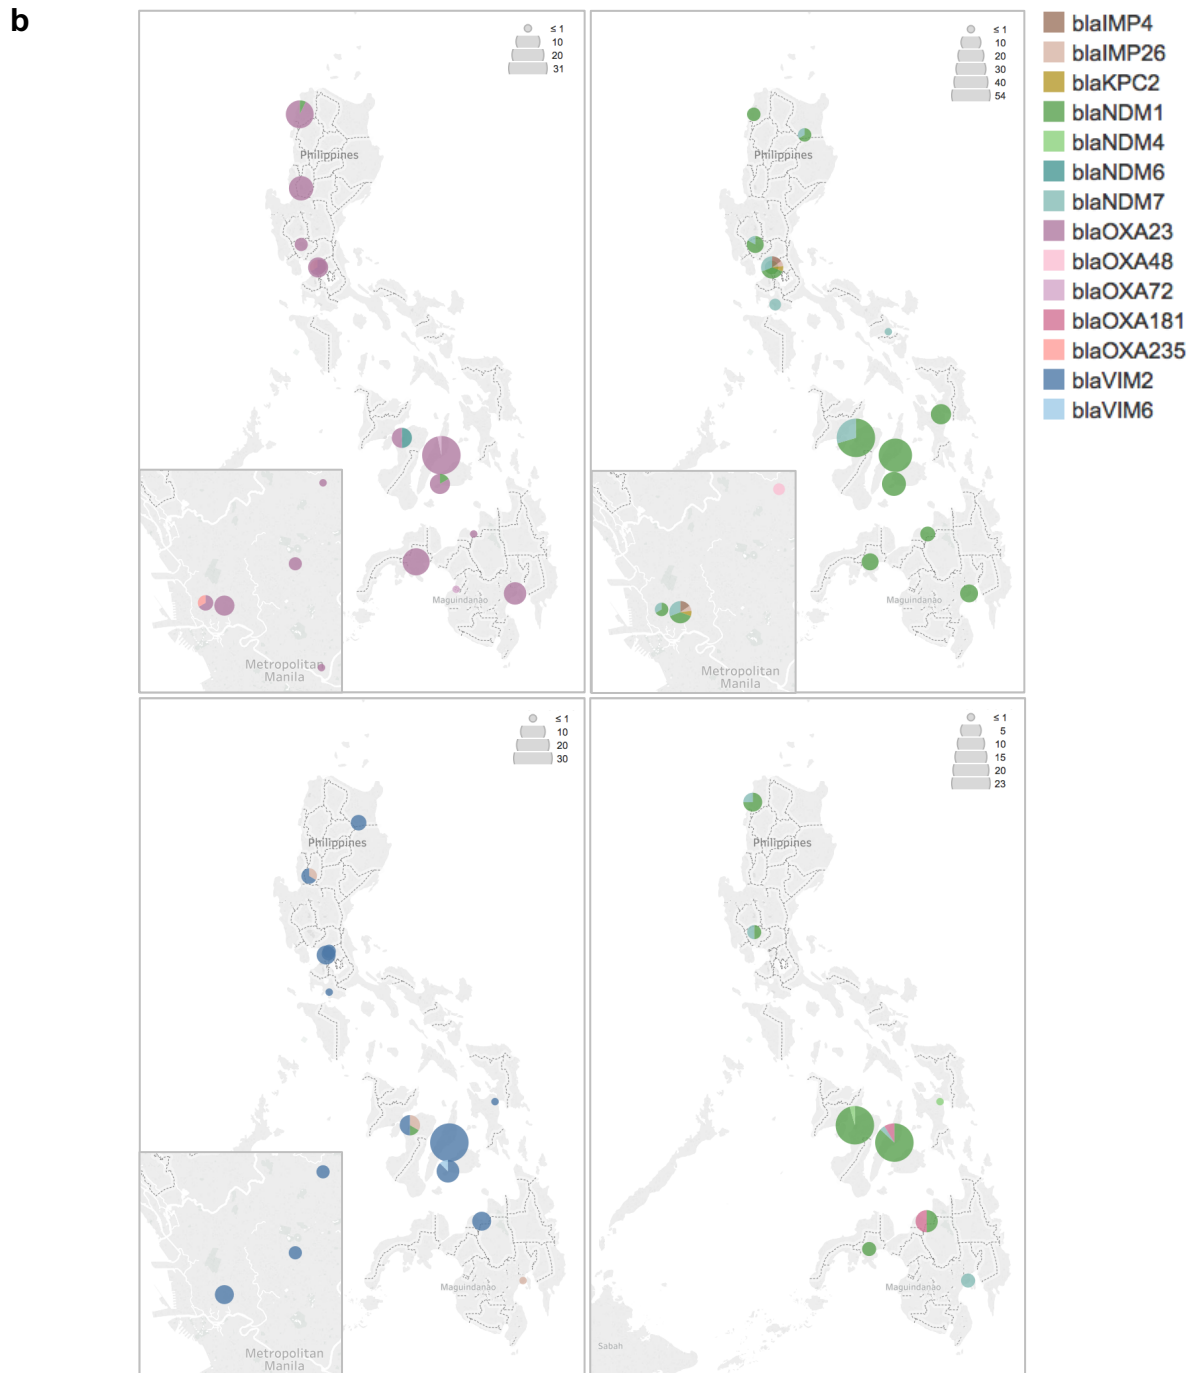

**Supplementary Figure 3. a** Relative abundance of individual carbapenemase gene calls in *A. baumannii* (Aba), *P. aeruginosa* (Pae), *K. pneumoniae* species complex (Kpn), and *E. coli* (Eco) genomes. **b** Geographic distribution and relative abundance of carbapenemase genes across the sentinel sites. The size of the piecharts is proportional to the total number of individual gene calls for each organism. Map insets show the detail of the national capital region.

## Local scale of surveillance - plasmid driven hospital outbreak of carbapenem-resistant *K. pneumoniae*

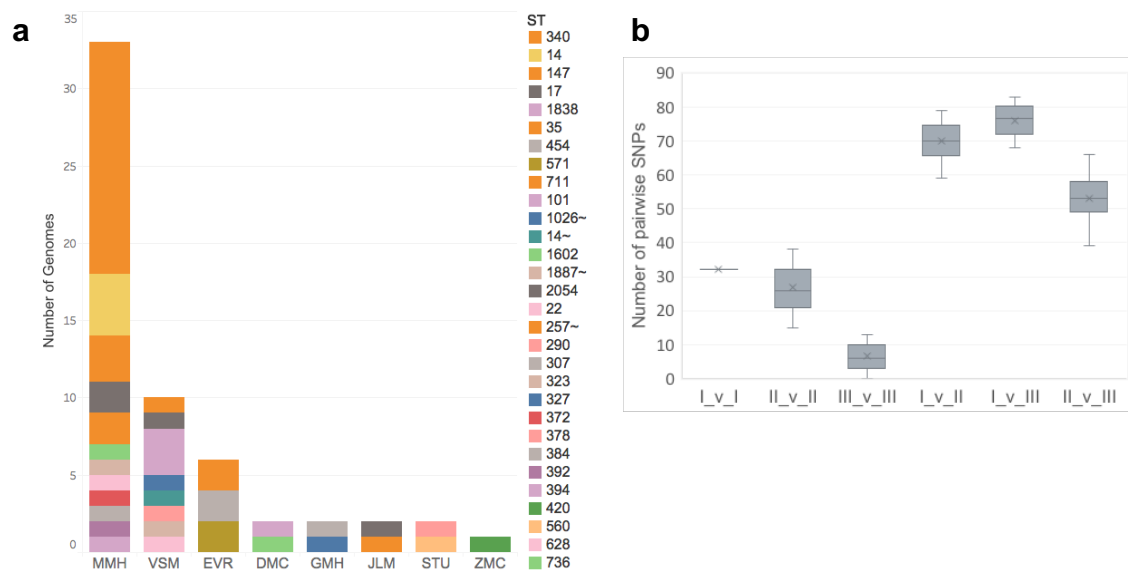

**Supplementary Figure 4. a** Breakdown of *K. pneumoniae* species complex genomes with resistance phenotype AMP FOX CAZ CRO FEP IPM AMC TZP GEN AMK CIP SXT (RP-6) by sentinel site and ST. **b** Box and whisker plot of pairwise SNP differences within and between the three ST340 clades defined in Figure 4a. The median is indicated by the horizontal line, while the mean is indicated by an x. The whiskers indicate variability outside the upper and lower quartiles (box bounds). The pairwise SNP differences between genomes from clade III (N=105 pairwise comparisons) are significantly lower than those between genomes from clade II (N=15 pairwise comparisons, two-tailed Mann-Whitney U test, z-score -6.265, p-value = 3.70767e-10).

**Supplementary Note 1.** Plasmid p13ARS\_MMH0112-3 (Supplementary Figure 5a) exhibited high sequence similarity to three plasmids found in international isolates of other Enterobacteriaceae, as well as to plasmid p14ARS\_CVM0040-2 from a *K. pneumoniae* ST147 isolate from this study (Supplementary Figure 5b). The main difference was the lack of a transposon carrying KpsC and KpsS, both encoding capsule polysaccharide biosynthesis proteins, in p13ARS\_MMH0112-3. This suggests p13ARS\_MMH0112-3 may have derived from an epidemic plasmid of global circulation that also circulates in the Philippines.

**Supplementary Note 2.** A second plasmid (p13ARS\_MMH0112-2) carried the ESBL gene *bla*<sub>CTX-M-15</sub>, as well as other AMR genes and genomic islands for ferric dicitrate transport and resistance to heavy metals (Table 2 and Supplementary Figure 5a). Resistance to heavy-metals can aid survival in the hospital environment (1), while iron acquisition is crucial for survival within the host (2). By mapping short Illumina reads of all 33 possible-XDR genomes from MMH to the p13ARS\_MMH0112-2 sequence, we found the entire plasmid sequence (i.e., ≥95% of the length) represented only in the 15 ST340 genomes (Supplementary Figure 5c), suggesting that this plasmid contributed to the persistence of this clone in the hospital environment, and in particular in the NICU. This is of significance in view of the non-overlapping hospitalization periods of most of the NICU patients.



## National scale of surveillance - regional circulation of a successful *K. pneumoniae* lineage

**Supplementary Note 3.** The Philippine genomes from major clades II-III were found interspersed with international genomes, suggesting that they represent lineages of international circulation (Supplementary Figures 6a). For example, the genomes in clade III-B clustered with seven genomes from Singapore (N=4), Poland (N=2), Germany (N=1) and Denmark (N=1), from which they differ by an average of 63 (+/- 10) pairwise SNPs.

In contrast, the genomes in clade IV were more distantly related to the global genomes, differing from the closest genomes from Singapore (N=1) and Turkey (N=5) by an average of 114 (+/- 7) SNPs. This observation together with the lack of matches to plasmids p13ARS\_GMH0099 and p14ARS\_VSM0843-1 in the nucleotide databases, and the broader geographic distribution of clade IV in the Philippines, suggest that it may be unique to this country, though a larger representation of ST147 genomes from Asia is needed to ascertain this.

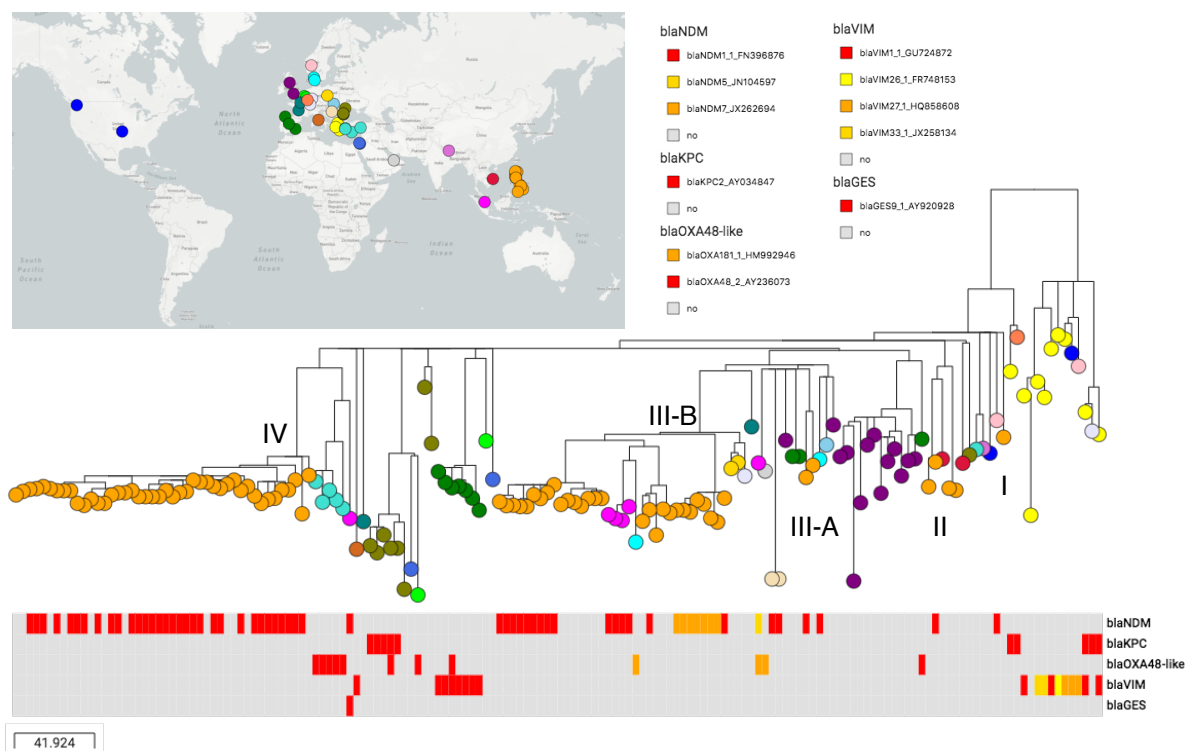

**Supplementary Figure 6.** Phylogenetic analysis of 80 *K. pneumoniae* ST147 genomes from the Philippines in global context. The distribution of carbapenemase genes and variants is shown as tree blocks. This interactive view is available at [https://microreact.org/project/ARSP\\_KPN\\_ST147\\_GLOBAL/f21f2b91](https://microreact.org/project/ARSP_KPN_ST147_GLOBAL/f21f2b91). The maximum-likelihood tree of 160 genomes was inferred from 3367 SNP sites identified from mapping the genomes to reference MS6671 (LN824133.1), after regions of MGEs and recombination were masked. The data are available at [https://microreact.org/project/ARSP\\_KPN\\_ST147\\_GLOBAL](https://microreact.org/project/ARSP_KPN_ST147_GLOBAL).

**Supplementary Note 4.** We did not identify an NDM gene (or any other carbapenemase gene) in 11 genomes from carbapenem non-susceptible ST147 isolates (Figure 5). Carbapenem resistance could not be explained by the combinatorial mechanism of an ESBL gene (e.g., *bla<sub>CTX-M-15</sub>*) and OmpK porin disruption, as both the *ompk35* and *ompk36* genes were intact in these genomes (Supplementary Figure 7). Notably, the 11 genomes were found within the subclade characterized by the presence of the large mosaic plasmid p13ARS\_GMH0099. The distribution of AMR genes showed that the genomes harboured most of the Tn2 transposon that carries *bla<sub>TEM-1</sub>* interrupted by the *ISEcp1-bla<sub>CTX-M-15</sub>* element but had lost most of the remaining AMR genes (Supplementary Figure 7). *ISEcp1* usually mobilizes the *bla<sub>CTX-M-15</sub>* gene, and has been reported to trigger transposition events to the chromosome (3). However, we could not confirm a chromosomal location in the draft assemblies, as the contigs containing *bla<sub>CTX-M-15</sub>* and *bla<sub>TEM-1</sub>* did not span beyond the flanking transposases. Alternatively, plasmid damage or partial plasmid loss may have occurred between resuscitation of the isolates and WGS.

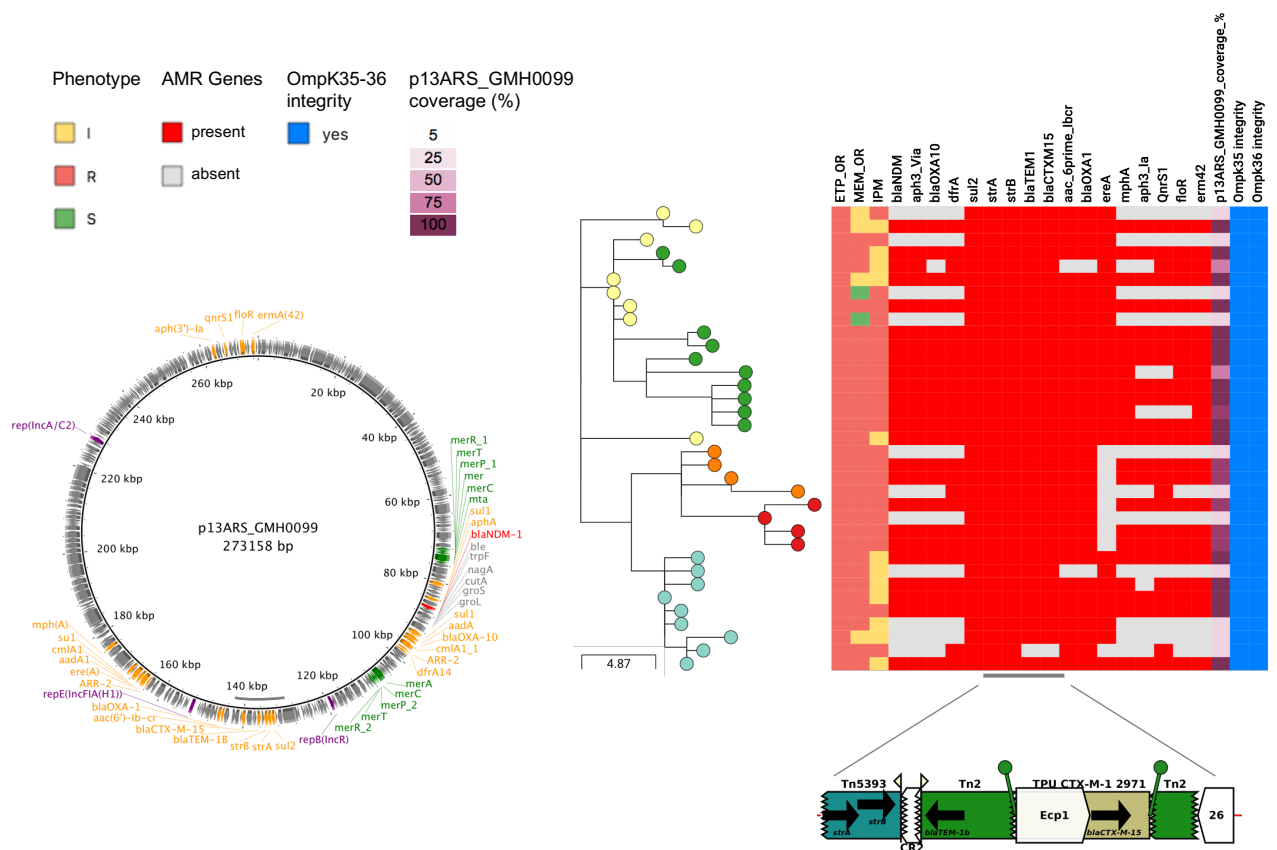

**Supplementary Figure 7. Potential NDM-1 plasmid loss within clade IV.** Distribution of resistance phenotypes (I, intermediate; R, resistant; S, susceptible) to ertapenem (ETP), meropenem (MEM) and imipenem (IPM), AMR genes, plasmid p13ARS\_GMH0099, and OmpK porins in clade IV genomes. The AMR genes from the short reads are displayed as per the order in the plasmid sequence (plasmid map), and genes present in multiple copies were omitted. Short reads were mapped to the p13ARS\_GMH0099 sequence and a plasmid match was accounted when the reads covered at least 95% of the sequence length with at least 5x depth of coverage. The detailed structure of Tn2-*ISEcp1* is shown below the gene blocks, and highlighted by a grey bar.



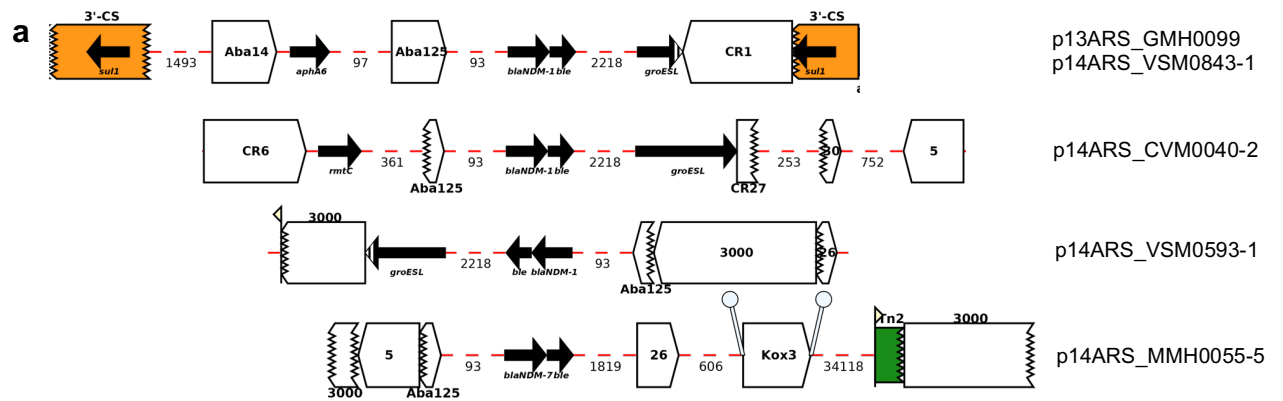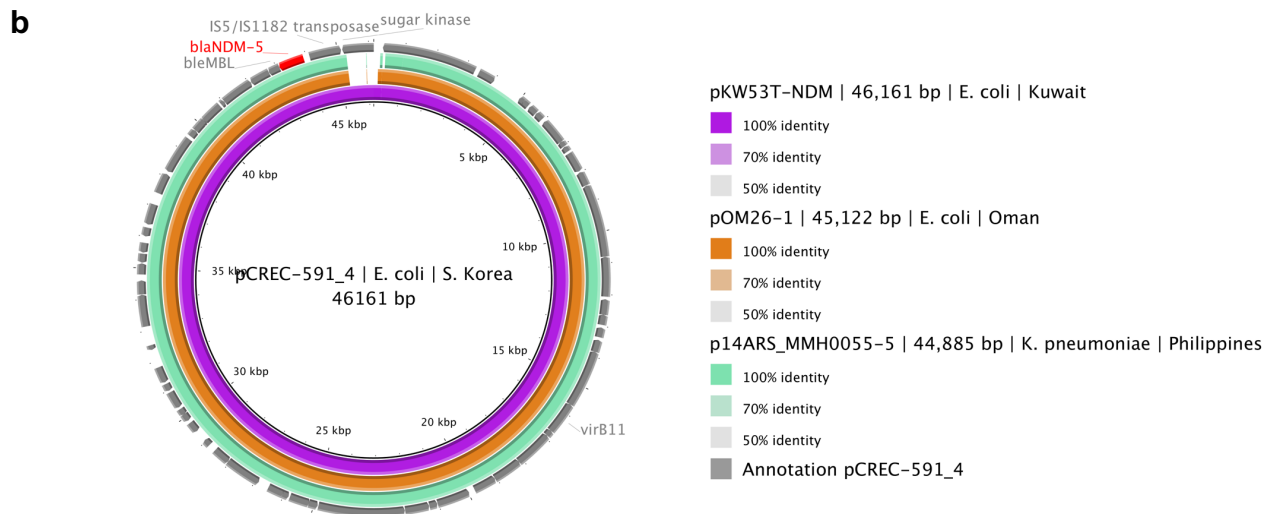

**Supplementary Figure 8. Plasmids from *K. pneumoniae* ST147 representative isolates. a** Context of NDM genes in plasmid sequences, showing either intact (solid lines) or truncated (jagged lines) IS*Aba125* upstream elements. **b** Comparison of p14ARS\_MMH0055-5 to three international plasmids (CP024825.1, KX214669.1, and KP776609.1). Plasmid pCREC-591\_4 was used as a reference (innermost black circle).

## International scale of surveillance - high-risk clone of *E. coli* ST410 with NDM-1 and OXA-181

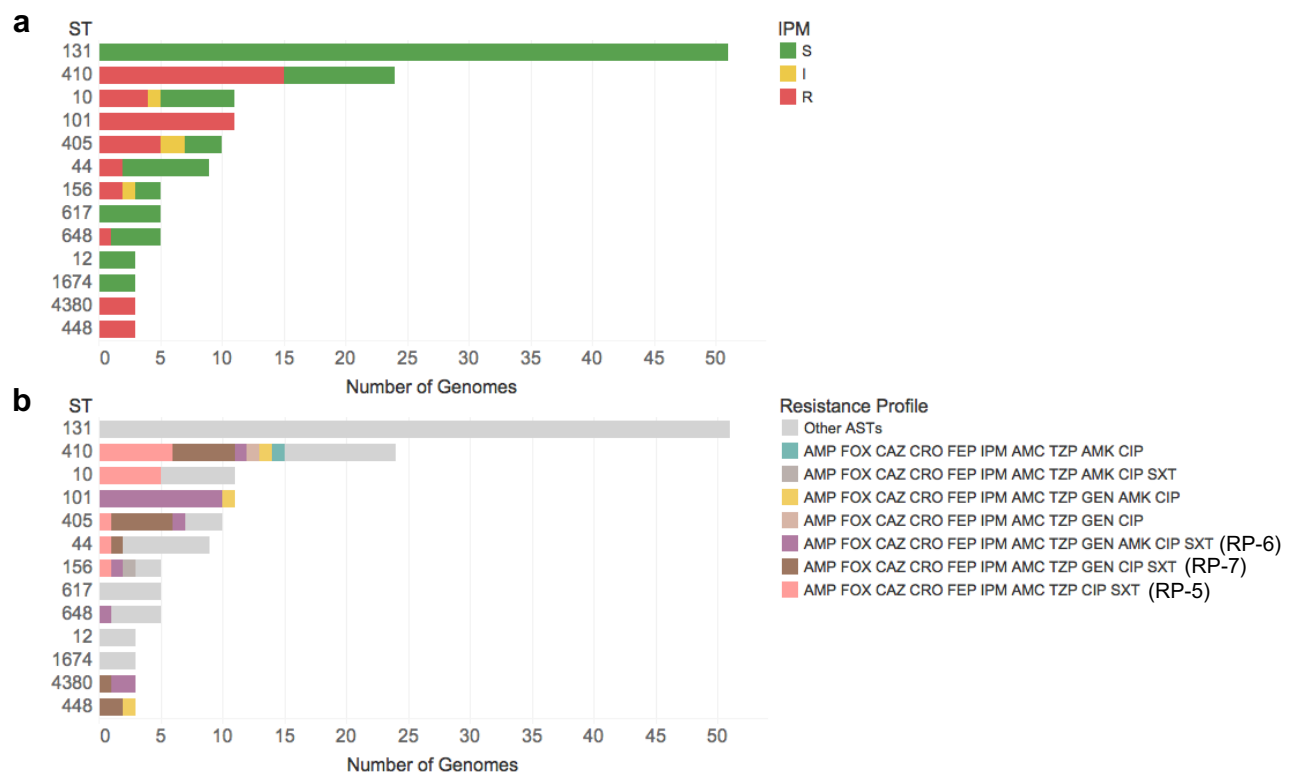

**Supplementary Figure 9.** Distribution of resistance to imipenem (a) and resistance profiles (b) across the *E. coli* STs. Only STs represented by at least three genomes are shown. S: susceptible; I: intermediate; R: resistant. Other ASTs: any other resistance profile with susceptibility to imipenem.

**Supplementary Note 5.** The phylogenetic analysis of *E. coli* ST410 genomes in global context showed that the three clones with possible-XDR isolates were included within a major lineage delineated by the presence of *bla*<sub>CMY-2</sub> (Figure 6b), and characterized by global distribution, the presence of clinical and environmental isolates, the presence of a larger number of resistance genes per genome (mean number  $16.31 \pm 4.85$ ,  $N=44$ , vs  $7.45 \pm 2.54$ ,  $N=36$ , Mann-Whitney U-test z score  $6.824$ ,  $p=8.86846 \times 10^{-12}$ ), and fewer genetic differences between genomes (mean number of pairwise SNP differences  $41.55 \pm 36.72$ ,  $N=665$  pairwise comparisons, vs  $157.98 \pm 47.68$ ,  $N=989$  pairwise comparisons, two-tailed Mann-Whitney U-test z score =  $-31.23$ ,  $p < 0.0001$ ), consistent with the characteristics of high-risk clones.

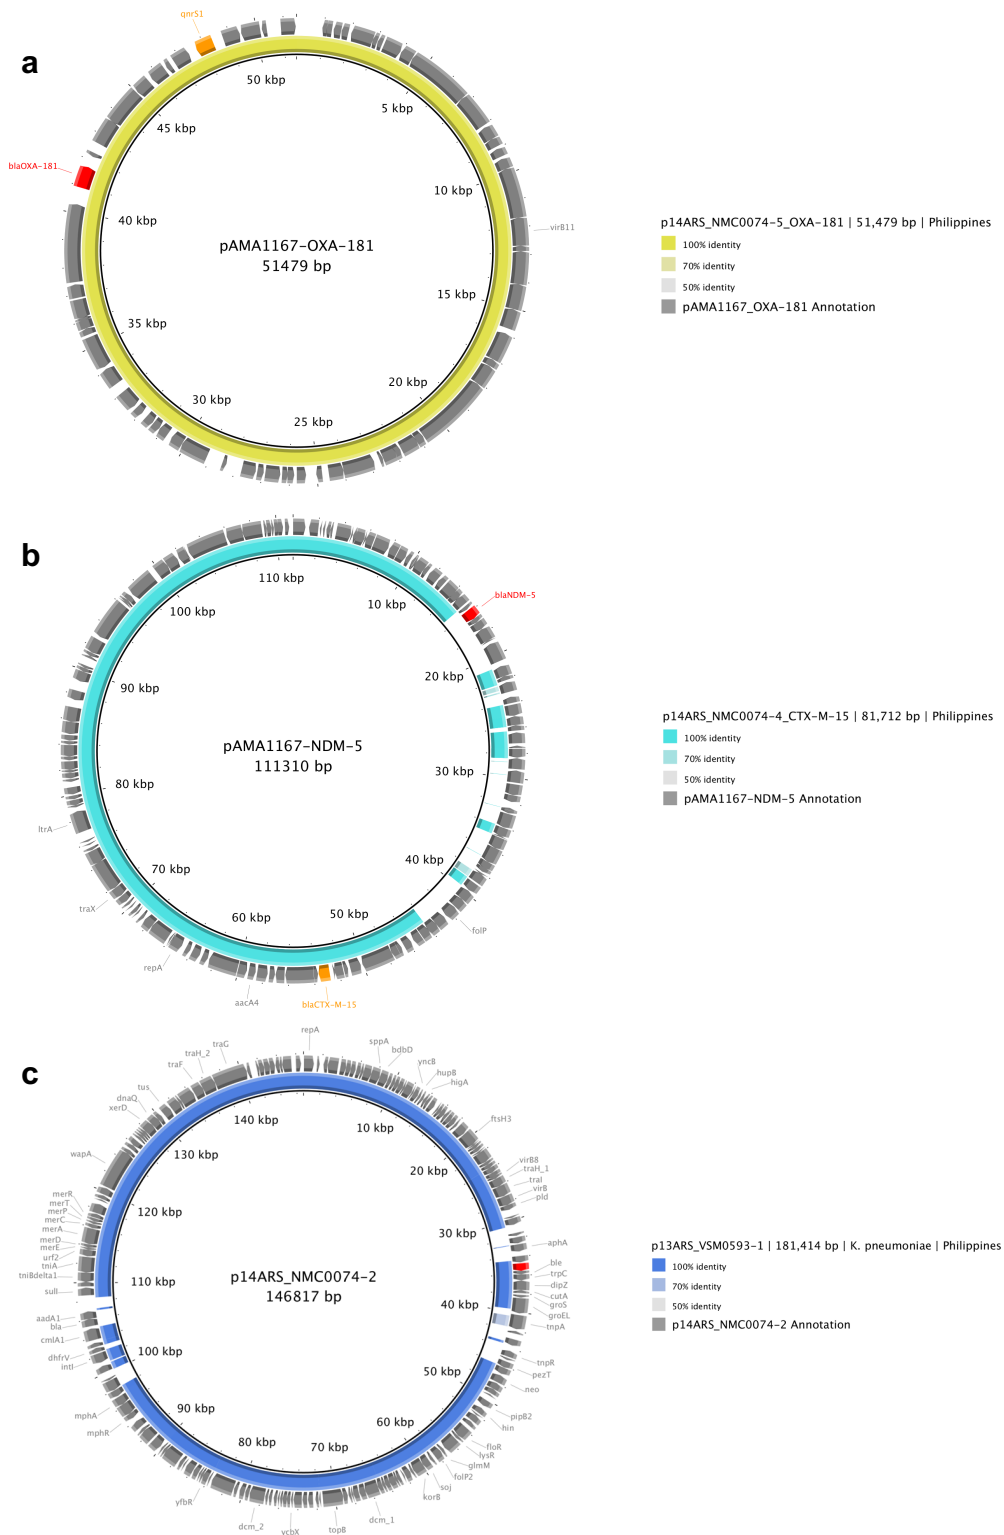

**Supplementary Figure 10. Comparison of plasmids from *E. coli* ST410 strain 14ARS\_NMC0074.**  
**a** Comparison of plasmid p14ARS\_NMC0074-5 carrying *bla*<sub>OXA-181</sub> to plasmid pAMA1167-OXA-181 (reference, CP024806.1). **b** Comparison of plasmid p14ARS\_NMC0074-4 carrying *bla*<sub>CTX-M-15</sub> to pAMA1167-NDM-5 (reference, CP024805.1). **c** Comparison of plasmid p14ARS\_NMC0074-2 carrying *bla*<sub>NDM-1</sub> to p13ARS\_VSM0593-1 from a *K. pneumoniae* ST147 strain from this study.

**Supplementary Note 6.** The members of the Antimicrobial Resistance Surveillance Program are: Jerry C. Abroqueña, Minda B. Aguenza, Sherine Alcantara, Evelyn M. Andamon, Myrna P. Angeles, Cecilia Belo, Julie B. Cabantog, Donna M. Calaoagan, Jobert A. Castillon, Joseph D. De Las Alas, Jerilyn L. Dulay, Mari Esguerra, Ann D. Fandida, Elizabeth Fangot, Hans D. Ferraris, Daisy Goco, Oscar P. Grageda, Bernadette B. Hapitana, Evelina Lagamayo, Modesty A. Leaño, Nena S. Lingayon, Myra Olicia, Rhodora B. Ongtangco, Jane G. Pagaddu, Aireen P. Parayno, Ingrid D. Peralta, Grace L. Pong, Cleocita P. Portula, Teresita N. Rebuldad, Maricel Ribo, Chanda G. Romero, Annette L. Salillas, Emerita T. Sinon, Karlo Tayzon, Kristine Anne Vasquez, Januario D. Veloso, Ma. Merlina A. Vistal, Marilyn T. Zarraga

### **Supplementary References**

1. Pal C, Asiani K, Arya S, Rensing C, Stekel DJ, Larsson DGJ, et al. Metal Resistance and Its Association With Antibiotic Resistance. *Adv Microb Physiol.* 2017;70:261-313.
2. Wooldridge KG, Williams PH. Iron uptake mechanisms of pathogenic bacteria. *FEMS Microbiol Rev.* 1993;12(4):325-48.
3. Hudson CM, Bent ZW, Meagher RJ, Williams KP. Resistance determinants and mobile genetic elements of an NDM-1-encoding *Klebsiella pneumoniae* strain. *PLoS One.* 2014;9(6):e99209.
